# Supplementary material for: Direct electrophoretic deposition of an ultra-strong separator on an anode in a surfactant-free colloidal system for lithium ion batteries
Source: Royal Society of Chemistry journal article supplement (doi:10.1039/c8ta09092k), 2018-11-29
Supplement: c8ta09092k1.pdf [file c8ta09092k1.pdf]

*Supporting Information*

**Direct electrophoretic deposition of ultra-strong separator on anode in a surfactant-free colloidal system for lithium ion batteries**

*Yupei Han<sup>a,†</sup>, Luhan Ye<sup>b,†</sup>, Bismark Boateng<sup>a,†</sup>, Qingwei Sun<sup>a</sup>, Cheng Zhen<sup>a</sup>, Ning Chen<sup>a</sup>, Xingyi Shi<sup>a</sup>,  
James H. Dickerson<sup>c</sup>, Xin Li<sup>b,\*</sup>, Weidong He<sup>a,\*</sup>*

<sup>a</sup>School of Physics, University of Electronic Science and Technology of China, Chengdu 611731, P.R. China. <sup>b</sup>John A. Paulson School of Engineering and Applied Sciences, Harvard University, Cambridge, Massachusetts 02138, USA. <sup>c</sup>Department of Physics, Brown University, Providence, RI 02912, USA.

Corresponding Authors\*: [lixin@seas.harvard.edu](mailto:lixin@seas.harvard.edu), [weidong.he@uestc.edu.cn](mailto:weidong.he@uestc.edu.cn). <sup>†</sup>These authors contributed equally.

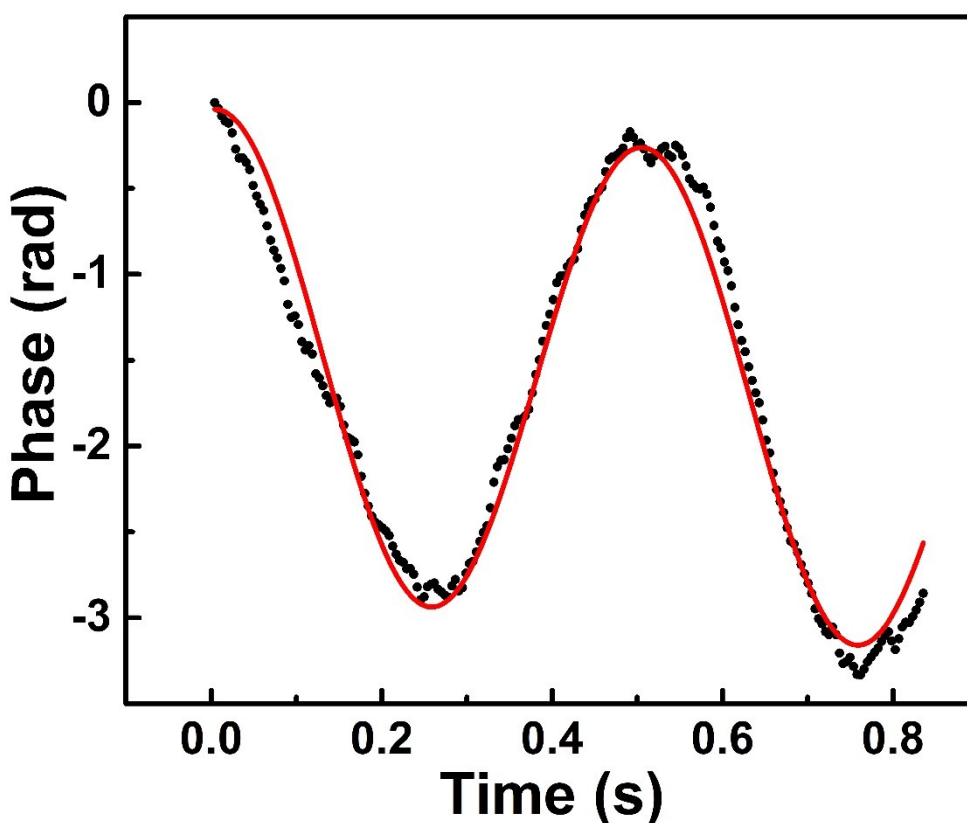

**Figure S1.** Zeta-potential of the PVdF-HFP/acetone colloidal solution. Acetone diluted PVdF-HFP colloidal samples was analyzed for zeta potential measurement using NanoBrook 90Plus PALS (BrookHaven, USA).

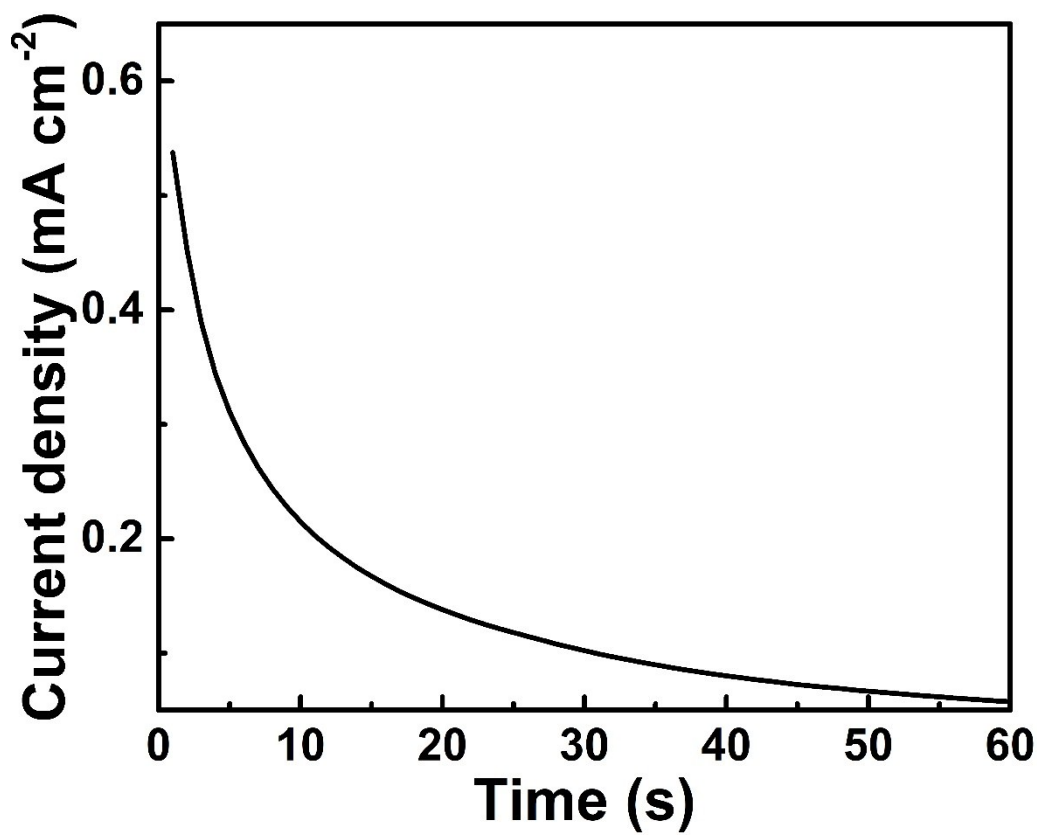

Figure S2. Electrophoretic current profile (current density vs. time).

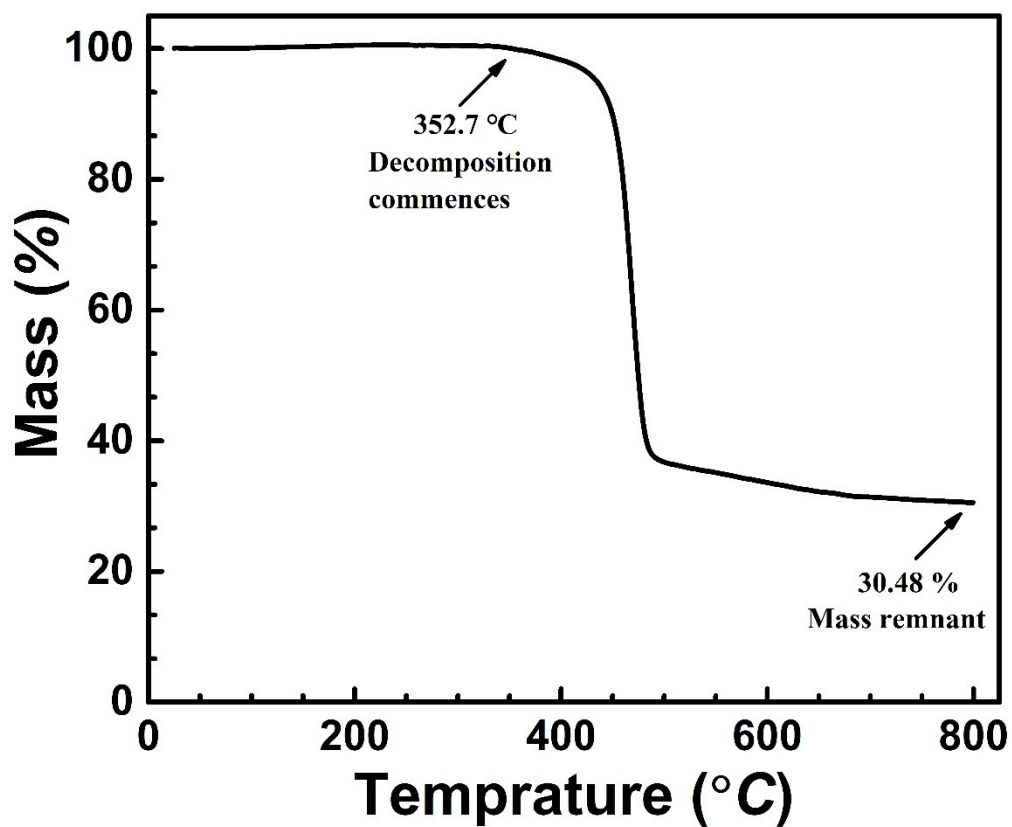

**Figure S3.** Thermogravimetric analysis (TGA) of the EPD separator. TG was performed using a simultaneous thermal analyzer STA-449F3 (Netzsch, Germany), with samples heated up to 800 °C at 10 °C min<sup>-1</sup> in N<sub>2</sub> atmosphere.

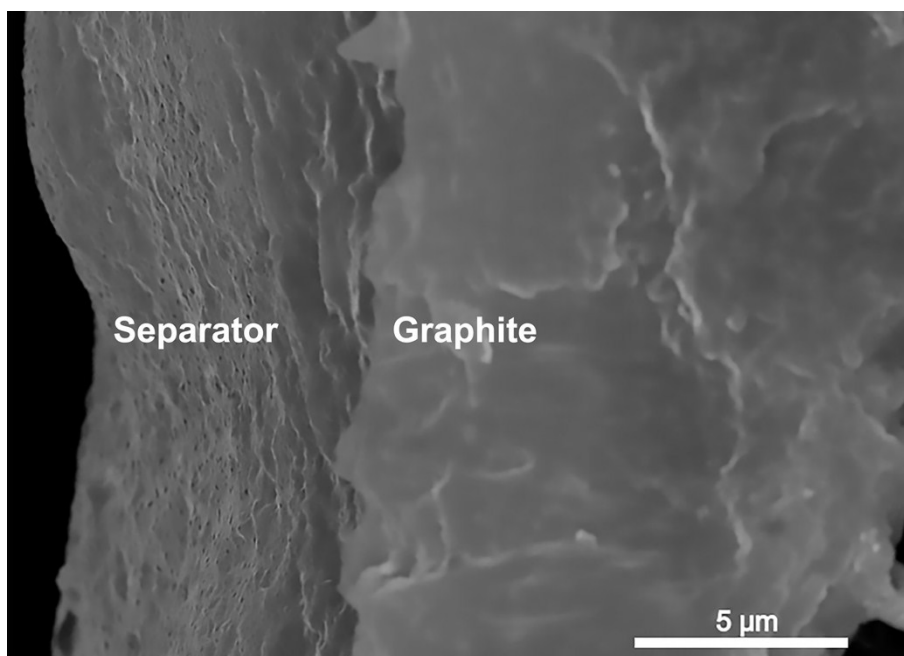

**Figure S4.** Cross-sectional SEM images of the separator-anode structure.
